# Supplementary material
Source: MDPI journal article supplement (https://www.mdpi.com/2227-9717/6/11/217)
Supplement: s1 [file s1]

## 1 Molecular concentration under cellular birth and death in Quorum Sensing

We perform simulation on a population of 1000 bacteria cells for duration of 100 minutes.

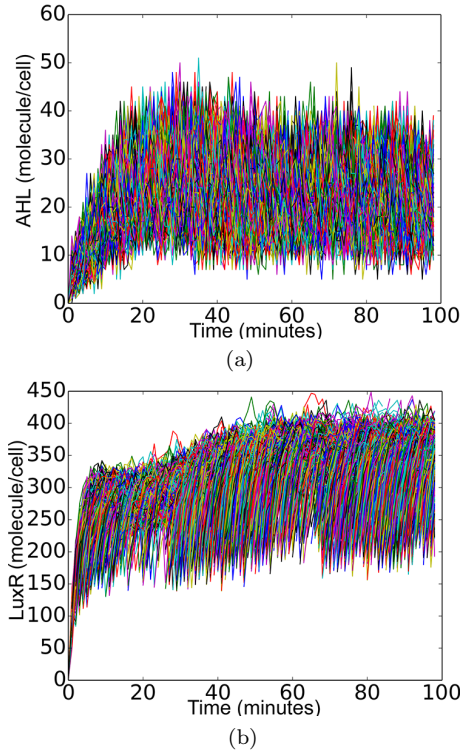

Figure S1. Temporal evolution of molecular dynamics under cellular birth and death (a) AHL (b) LuxR

Figure S1 shows the the evolution of concentration of AHL and LuxR molecules. We follow the condition of constant cell density for cellular birth and death as per [1].

## References

- [1] Marc Weber and Javier Buceta. Dynamics of the quorum sensing switch: stochastic and non-stationary effects. *BMC systems biology*, 7(1):6, 2013.
